# Supplementary material for: Childhood cancer incidence by ethnic group in England, 2001–2007: a descriptive epidemiological study
Source: Springer Nature journal article supplement (doi:10.1186/s12885-017-3551-7), 2017-08-25
Supplement: MOESM1 [file 14304474]

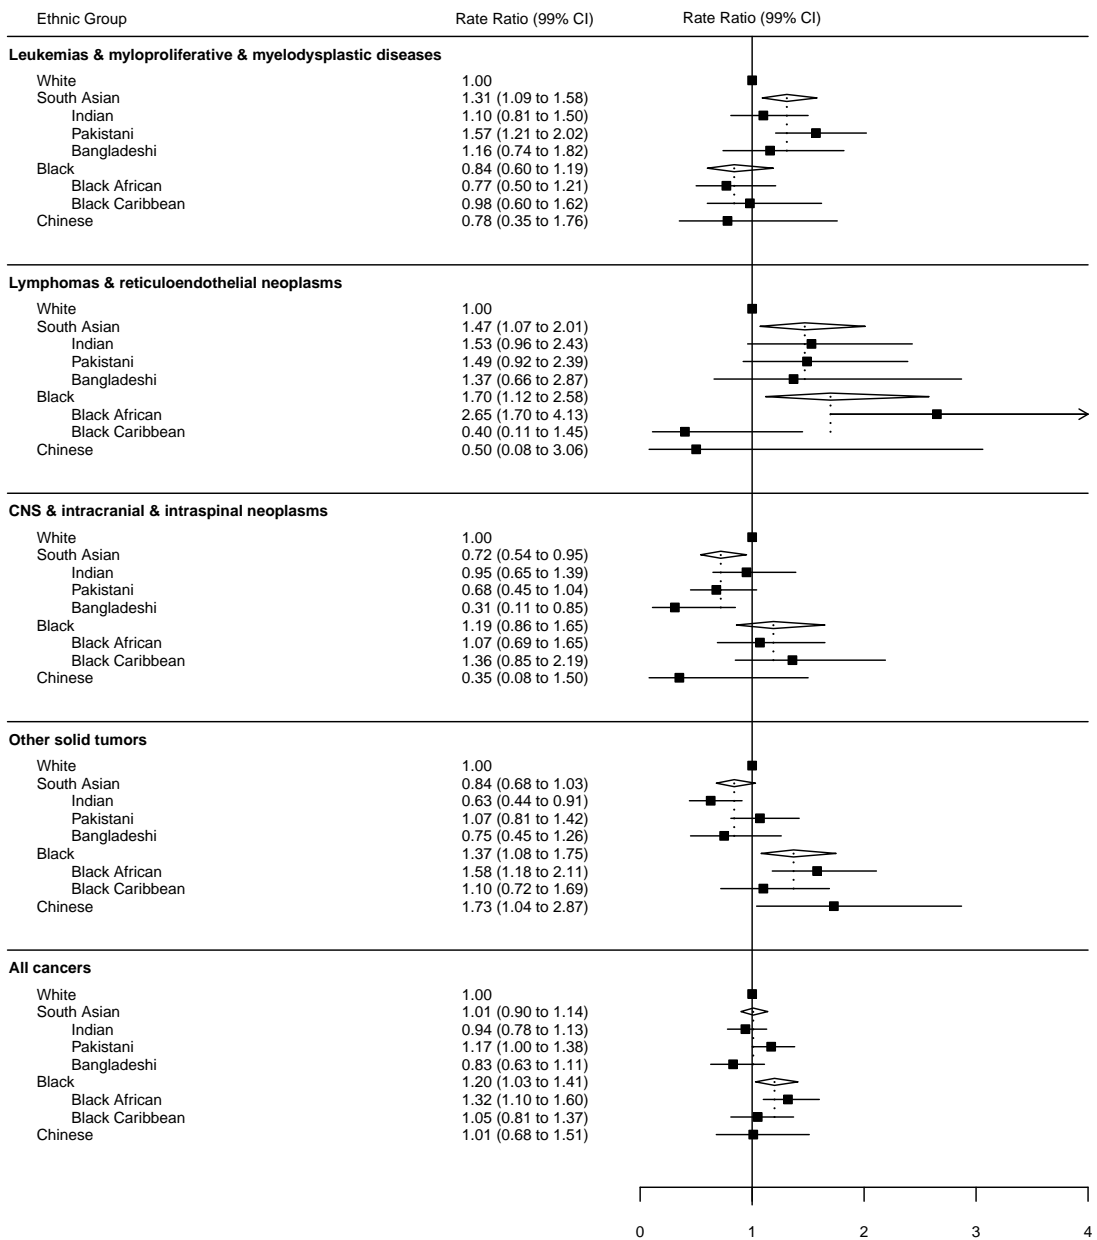

\*99% FCI (squares and lines); 99% CI (diamonds); adjusted for age, sex and deprivation
